# Supplementary material
Source: PubMed Central journal article supplement (PMC3711144)
Supplement: NIHMS471456-supplement-01.pdf [file NIHMS471456-supplement-01.pdf]

**Supplementary Table 1: Transduction efficiency of wild-type and tyrosine-mutant scAAV6-EGFP vectors in CD34<sup>+</sup> cells from Cynomolgus monkeys.**

| Transducing vector | % EGFP-positive cells |
|--------------------|-----------------------|
| Mock               | 1.7±0.4               |
| WT AAV6            | 2.3±1.7               |
| Y705F AAV6         | 4.1±2.7               |
| Y731F AAV6         | 3.7±2.2               |
| WT AAV2            | 2.1±0.1               |

Pooled CD34<sup>+</sup> cells from 4 Cynomolgus monkeys were transduced with the indicated vectors and transgene expression was evaluated by FACS. scAAV2 serotype vector was used as a control.
