# Supplementary material
Source: PubMed Central journal article supplement (PMC3711144)
Supplement: NIHMS471456-supplement-02.pdf [file NIHMS471456-supplement-02.pdf]

**Supplementary Table 2: scAAV6 vector-mediated transduction and transgene expression in primary human CD34<sup>+</sup> cells from bone marrow or umbilical cord blood under various culture conditions.**

| Experiment #                 | 1                     | 2                    | 3                     | 4                     | 5                     | 6                     | 7                    | 8                    | 9                    | 10                   | 11                   |
|------------------------------|-----------------------|----------------------|-----------------------|-----------------------|-----------------------|-----------------------|----------------------|----------------------|----------------------|----------------------|----------------------|
| <b>Source of cells</b>       | C                     | NC                   | C                     | C                     | C                     | NC                    | NC                   | C                    | C                    | C                    | C                    |
| <b>vgs/cell</b>              | 5x10 <sup>3</sup>     | 5x10 <sup>3</sup>    | 2x10 <sup>4</sup>     | 2x10 <sup>4</sup>     | 2x10 <sup>4</sup>     | 2x10 <sup>4</sup>     | 2x10 <sup>4</sup>    | 2x10 <sup>4</sup>    | 2x10 <sup>4</sup>    | 2x10 <sup>4</sup>    | 2x10 <sup>4</sup>    |
| <b>Duration of infection</b> | 2 hrs                 | 2 hrs                | 2 hrs                 | 2 hrs                 | 16 hrs                | 2 hrs                 | 16 hrs               | 2 hrs                | 16 hrs               | 2 hrs                | 2 hrs                |
| <b>Culture conditions</b>    | +SCF<br>+Flt3<br>+TPO | +SCF<br>+IL3<br>+IL6 | +SCF<br>+Flt3<br>+TPO | +SCF<br>+Flt3<br>+TPO | +SCF<br>+Flt3<br>+TPO | +SCF<br>+Flt3<br>+TPO | +SCF<br>+IL3<br>+IL6 | +SCF<br>+IL3<br>+IL6 | +SCF<br>+IL3<br>+IL6 | +SCF<br>+IL3<br>+IL6 | +SCF<br>+IL3<br>+IL6 |
| <b>EGFP-positive cells*</b>  | 9%                    | 4%                   | 12%                   | 29%                   | 23%                   | 45%                   | 20%                  | 16%                  | 19%                  | 7%                   | 11%                  |

C = Commercial

NC= Non-commercial

\*Each value represents an individual experiment, and each experiment was performed in triplicates.
