# Supplementary material
Source: PubMed Central journal article supplement (PMC3711144)
Supplement: NIHMS471456-supplement-03.pdf [file NIHMS471456-supplement-03.pdf]

**Supplementary Table 3: Numbers of Cy3-positive CD34<sup>+</sup> cells transduced with scAAV1, scAAV2, scAAV3, scAA6, and scAAV9 vectors.**

| Serotype | Cy3-positive cells (%) |
|----------|------------------------|
| scAAV1   | 2±1                    |
| scAAV2   | 12±2                   |
| scAAV3   | 8±4                    |
| scAAV6   | 57±1                   |
| scAAV9   | 2±1                    |
