# Supplementary material
Source: PubMed Central journal article supplement (PMC3711144)
Supplement: NIHMS471456-supplement-04.pdf [file NIHMS471456-supplement-04.pdf]

**Supplementary Table 4: Surface-exposed tyrosine residues on AAV2 and AAV6 capsids, and site-directed mutagenesis to phenylalanine residues.**

| AAV2 | AAV6   |
|------|--------|
| Y252 | Y252→F |
| Y272 | Y273→F |
| Y444 | Y445→F |
| Y500 | F501   |
| Y700 | Y701→F |
| Y704 | Y705→F |
| Y730 | Y731→F |

The surface-exposed tyrosine (Y) residues on AAV2 and AAV6 capsids are shown; red arrows denote the site-directed mutations from Y to phenylalanine (F) residues on AAV6 capsids.
