# Supplementary material
Source: PubMed Central journal article supplement (PMC3711144)
Supplement: NIHMS471456-supplement-05.pdf [file NIHMS471456-supplement-05.pdf]

**Supplementary Table 5: Primers for site-directed capsid mutagenesis of surface-exposed tyrosines on AAV6 capsid.**

| Mutants | Primer Sequences                                                                                                                                            |
|---------|-------------------------------------------------------------------------------------------------------------------------------------------------------------|
| Y252F   | <p>F: 5'-GGGCCTTGCCACCTT<b>T</b>AACAACCACCT<b>G</b>TACAAGCAAATCTCC-3'</p> <p>R: 5'-GGAGATTTGCTTGTAC<b>C</b>GGTGGTTGTTAAAGGTGGGCA<b>A</b>GGCCC-3'</p>        |
| Y273F   | <p>F: 5'- CAACGGGGG<b>C</b>TAGCAACGACAACCACT<b>T</b>CTTCGGCTACAGCACCCCTG-3'</p> <p>R: CAGGGGGTGCTGTAGCCGAAGAA<b>G</b>TGGTTGTCGTTGCT<b>A</b>GCCCCGTTG-3'</p> |
| Y445F   | <p>F: 5'-CATCGACCAGTACCTGTACT<b>T</b>CCTGAACAGAACTCAGAATCAG-3'</p> <p>R: 5'-CTGATTCTGAGTTCTGTT<b>C</b>AGGA<b>A</b>GTACAGGTA<b>C</b>GGTGGTTCGATG-3'</p>      |
| Y701F   | <p>F: 5'-GGAATCCCGAAGTGCAGT<b>T</b>TACATCTAACTATGCAAATCTGCCAAC-3'</p> <p>R: 5'-GTTGGCAGATTTTGCATAGTTAGATGTA<b>A</b>ACTGCAC<b>T</b>TCGGGATTCC-3'</p>         |
| Y705F   | <p>F: 5'-GTGCAGTATACATCTAACT<b>T</b>TGCCAAATCTGCCAACGTTGATTTC-3'</p> <p>R: 5'-GAAATCAACGTTGGCAGATTTGGCA<b>A</b>AGTTAGATGTATACTGCAC-3'</p>                   |
| Y731F   | <p>F: 5'-GTATTACAGGGGACGGGTGAGG<b>A</b>AACG<b>T</b>TGGCCAATGGGGCGAGGC-3'</p> <p>R: 5'-GCCTCGCCCCATTGGCAC<b>A</b>CGTT<b>T</b>CCTCACCCGTCCCCTGTAATAC-3'</p>   |

The **red** fonts denote the nucleotide substitutions that lead to mutations from tyrosine (Y) to phenylalanine (F) residues. The **blue** fonts denote the substitutions that lead to silent mutations to either create or delete a restriction enzyme site that allows independent confirmation of the mutation by enzyme digestion.
